# Supplementary material
Source: PubMed Central journal article supplement (PMC6703945)
Supplement: NIHMS1533059-supplement-2.pdf [file NIHMS1533059-supplement-2.pdf]

## Figure S1, Related to Figure 2

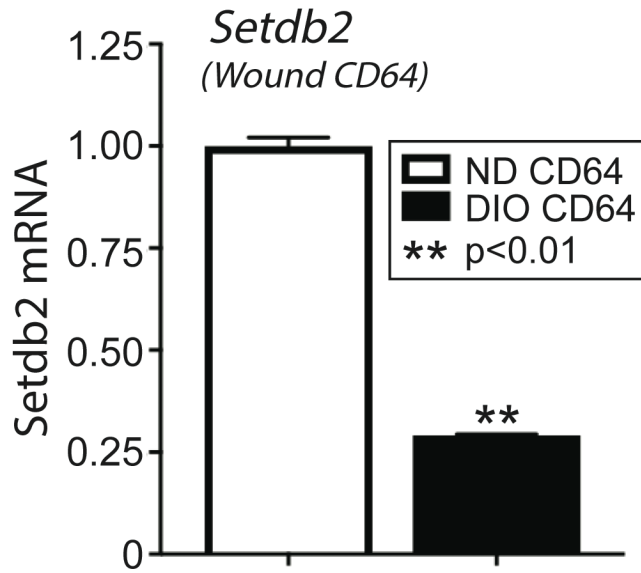

**Figure S1. Setdb2 expression is decreased in diabetic CD64+ cells.** Related to Figure 2. *Setdb2* expression quantified by qPCR in wound CD64+ cells MACs isolated from normal diet and DIO mice. (n =4 mice per group, replicated twice). \*P < 0.05, \*\*P < 0.01. Data are presented as the mean±SEM. Data were first analyzed for normal distribution and if data passed normality test, 2-tailed Student *t* test was used.

**Figure S2, Related to Figure 3B**

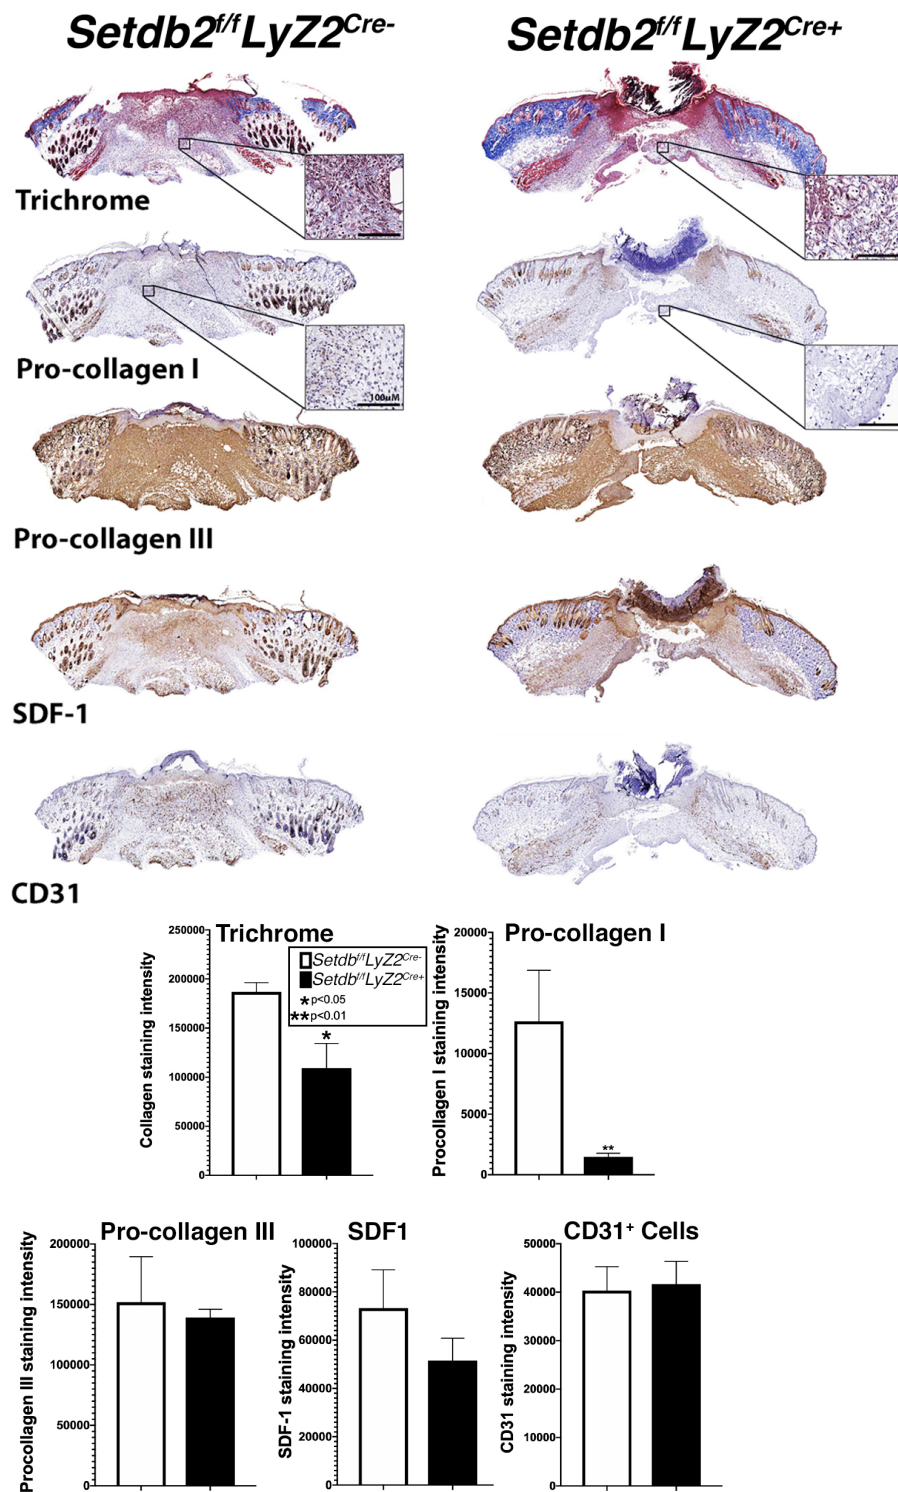

**Figure S2. Loss of Setdb2 in wound macrophages decreases collagen deposition.** Related to Figure 3. Wounds were stained with with Masson's Trichrome stain. Immunohistochemistry performed on Setdb2<sup>f/f</sup>LyZ2<sup>Cre-</sup> and Setdb2<sup>f/f</sup>LyZ2<sup>Cre+</sup> for pro-collagen-I, pro-collagen-II, SDF-1, and CD31. Representative images shown at 2X and 20X. Images were quantified ImageScope software. Data are presented as the mean±SEM. Data were first analyzed for normal distribution and if data passed normality test, 2-tailed Student t test was used.

# Figure S3, Related to Figure 3

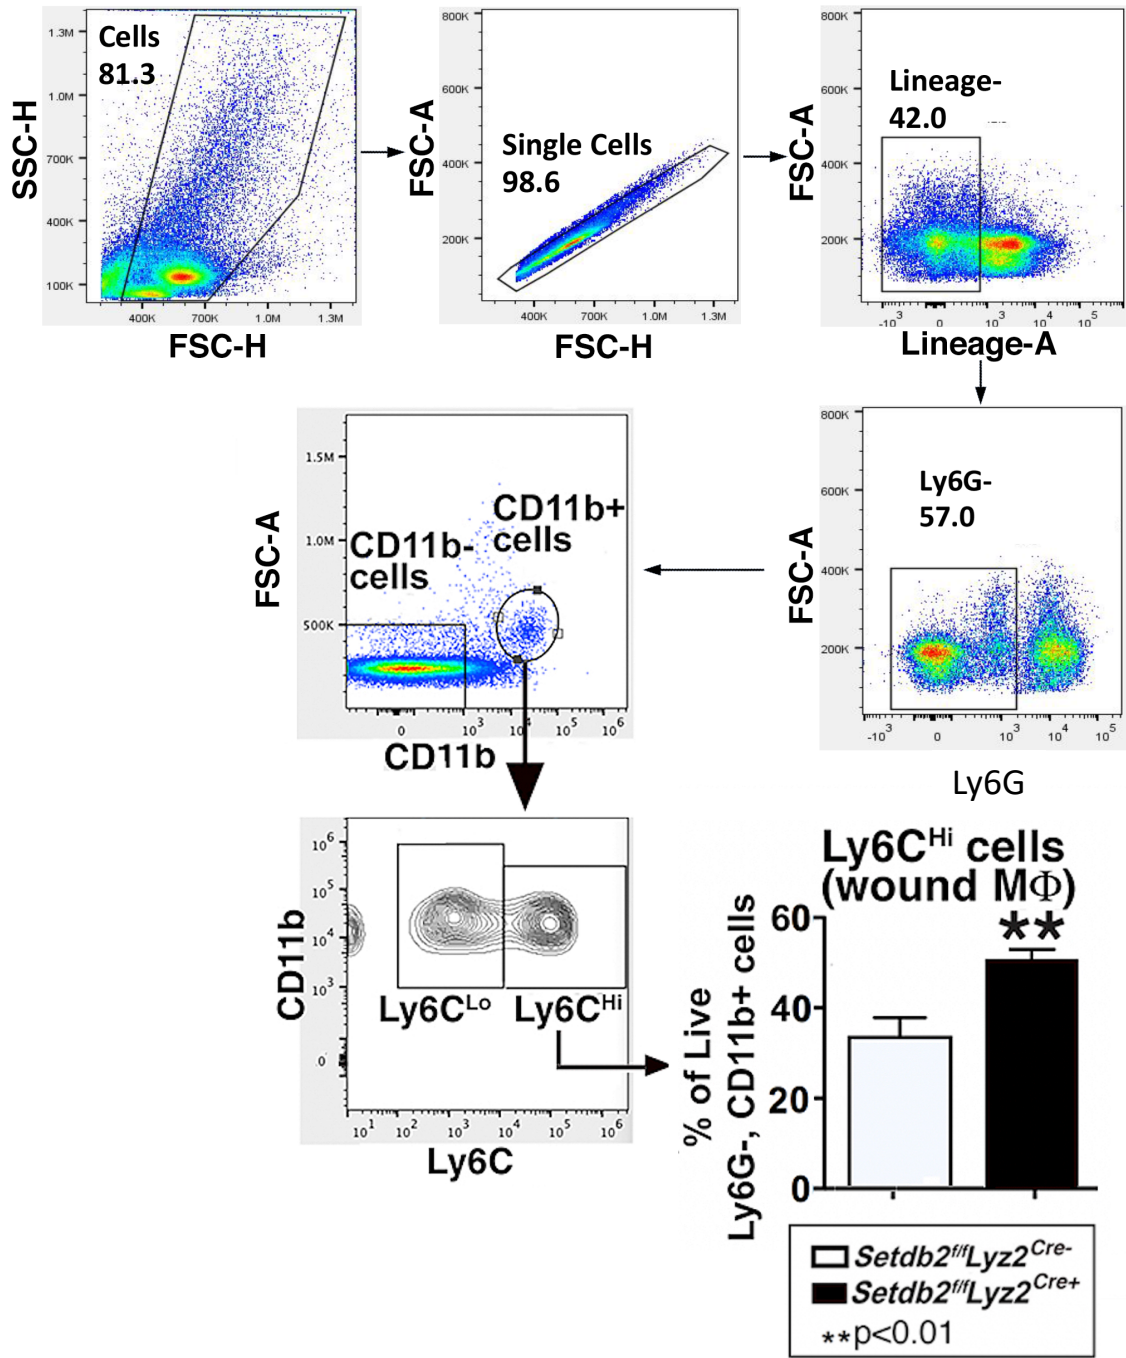

**Figure S3. Gating strategy for *Setdb2<sup>ff</sup>LyZ<sup>Cre-</sup>* and *Setdb2<sup>ff</sup>LyZ<sup>Cre+</sup>* wound Mφ.** Related to Figure 3. Ly6C<sup>Hi</sup> and Ly6C<sup>Lo</sup> wound monocyte/macrophages from *Setdb2<sup>ff</sup>LyZ<sup>Cre-</sup>* mice and littermate controls on day 5 (n = 6 mice per group) using the gating strategy demonstrated above to select single, live, Ly6G<sup>-</sup>, CD11b<sup>+</sup> cells and stratify by Ly6C<sup>Hi</sup> vs Ly6C<sup>Lo</sup>.

**Figure S4. Related to Figure 5**

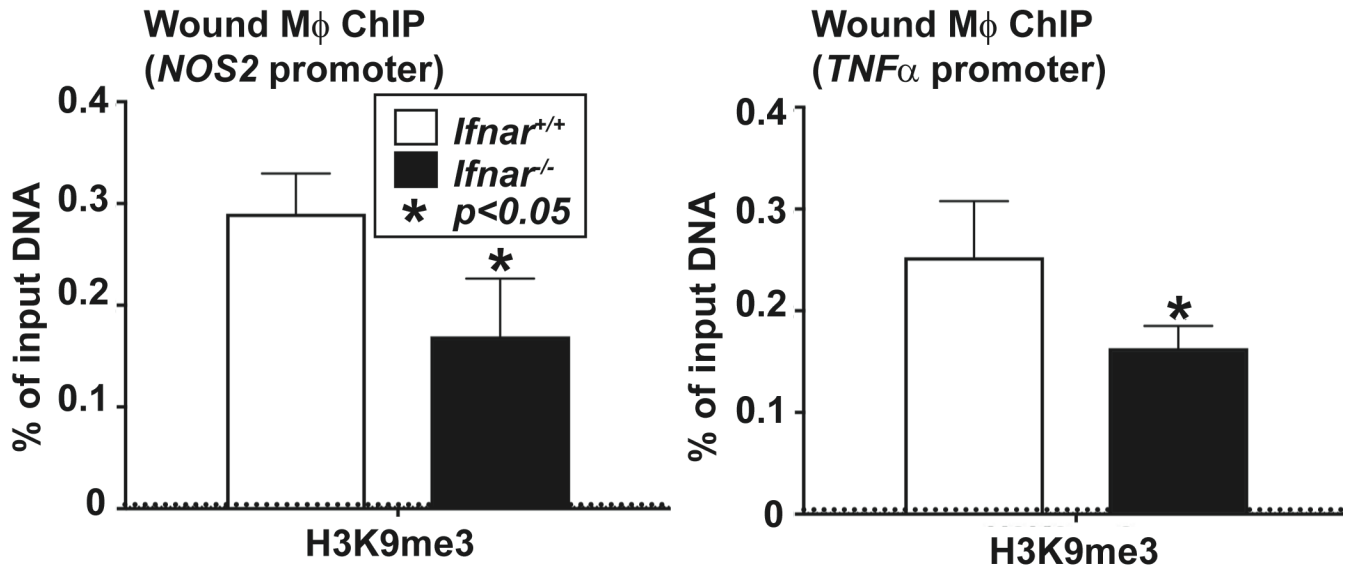

**Figure S4. H3K9me3 is reduced at the promoters of TNFα and NOS2 in Interferon alpha-receptor-deficient mice.** Related to Figure 5. ChIP analysis for H3K9me3 at the NF-κB binding site on the *TNFα* and *NOS2* promoters in wound macrophages from *Ifnar*<sup>-/-</sup> mice and *Ifnar*<sup>+/+</sup> controls (n = 6 mice per group). \*P < 0.05. Data are presented as the mean±SEM. Data were first analyzed for normal distribution and if data passed normality test, 2-tailed Student *t* test was used.

Figure S5. Related to Figure 5

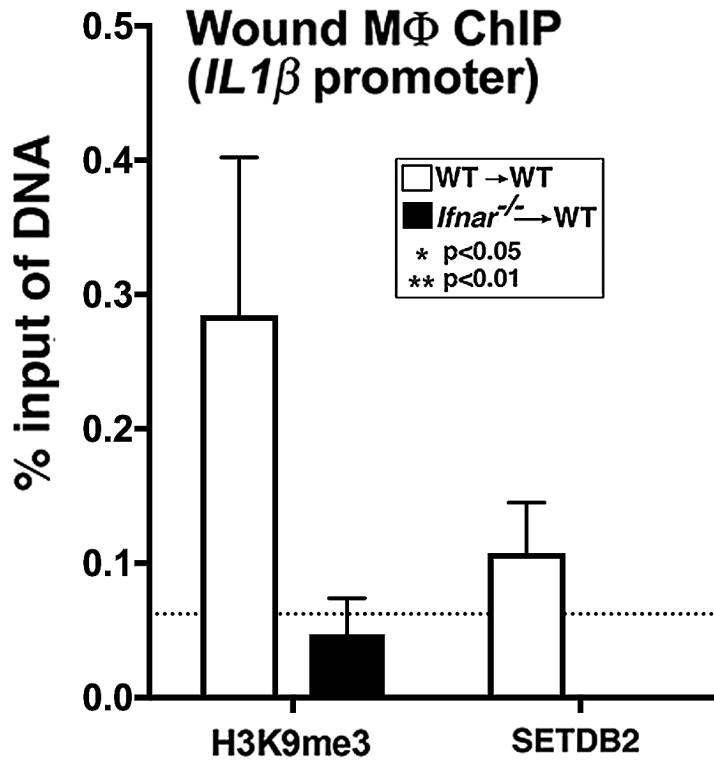

**Figure S5. Setdb2 and H3K9me3 are reduced at the *IL1B* promoter in control BMT mice with Interferon-deficient bone marrow.** Related to Figure 5. Bone marrow transplant was performed by injecting *Ifnar*<sup>-/-</sup> or *Ifnar*<sup>+/+</sup> control mice into irradiated *Ifnar*<sup>+/+</sup> control mice. Following reconstitution at 6 weeks, mice were wounded and wound macrophages isolated and ChIP analysis performed for H3K9me3 and Setdb2 at the NF-κB binding site on the *IL1β* promoter. (n=5 mice per group). Data are presented as the mean±SEM. Data were first analyzed for normal distribution and if data passed normality test, 2-tailed Student *t* test was used.

## Figure S6. Related to Figure 6.

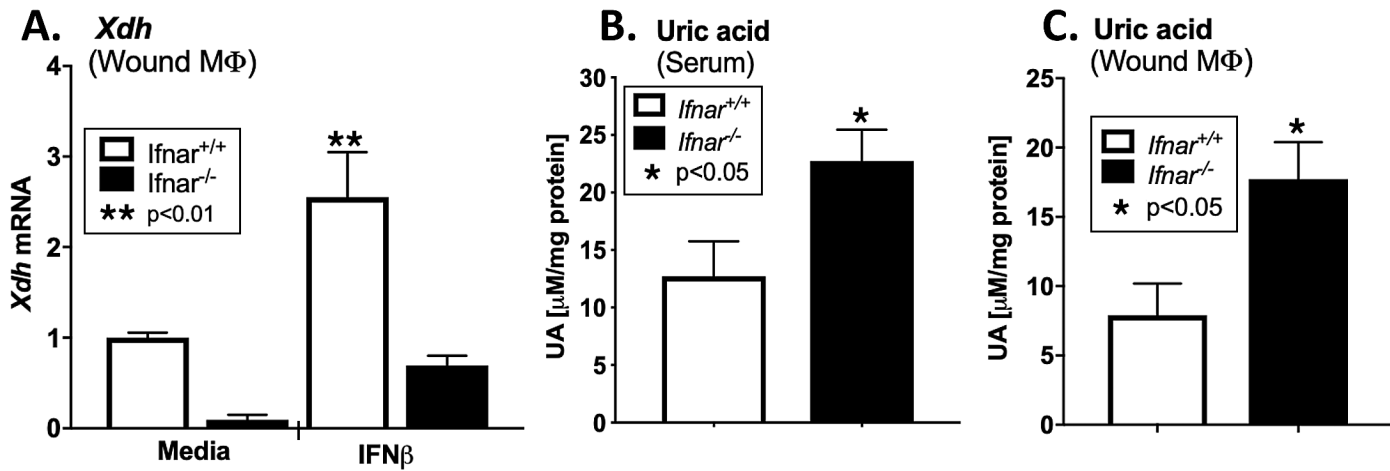

**Figure S6. Loss of *Ifnar* alters uric acid metabolism.** Related to Figure 6. (A) *Xdh* expression in wound macrophages from *Ifnar*<sup>+/+</sup> and *Ifnar*<sup>-/-</sup> mice stimulated *ex vivo* with IFN $\beta$ . (n = 5 mice per group). (B) UA levels in serum isolated from *Ifnar*<sup>+/+</sup> and *Ifnar*<sup>-/-</sup> (n = 5 per group mice). (C) UA levels in wound macrophages isolated on day 5 from *Ifnar*<sup>+/+</sup> and *Ifnar*<sup>-/-</sup> mice (n = 5 per group mice). All experiments are representative of 3 independent experiments. \*P < 0.05. Data are presented as the mean  $\pm$  SEM. Data were first analyzed for normal distribution and if data passed normality test, 2-tailed Student *t* test was used. For comparison between multiple groups, ANOVA followed by Newman–Keuls post hoc test was used.

**Table SI. Expression patterns of distinct CME. Related to Figure 2A.**

Superarray  
(Wound MΦ)

| Gene Symbol | Fold<br>Up-regulation |
|-------------|-----------------------|
| Hdac9       | 4.4108                |
| Esco2       | 3.9314                |
| Pak1        | 2.7276                |
| Prmt5       | 2.6556                |
| Prmt7       | 2.4155                |
| Rnf2        | 2.348                 |
| Aurka       | 2.2838                |
| Mysm1       | 2.1832                |
| Nek6        | 2.18                  |
| Prmt3       | 2.1775                |
| Ciita       | 2.12                  |
| Setd6       | 2.1179                |
| Rnf20       | 2.1121                |
| Setdb2      | 2.0637                |
| Usp16       | 2.0592                |
| Smyd1       | 2.0159                |
| Kat6b       | 2.0041                |
| Hdac11      | 1.976                 |
| Usp21       | 1.9604                |
| Hdac8       | 1.9588                |
| Setd4       | 1.9552                |
| Kat2b       | 1.9461                |
| Setd2       | 1.9421                |
| Esco1       | 1.9175                |
| Aurkb       | 1.9147                |
| Rps6ka3     | 1.9086                |
| Dzip3       | 1.8945                |
| Hdac7       | 1.8918                |
| Hat1        | 1.8802                |
| Kdm4c       | 1.8792                |
| Prmt6       | 1.8401                |
| Nsd1        | 1.839                 |
| Ncoa6       | 1.8257                |
| Ash11       | 1.8227                |
| B2m         | 1.8028                |
| Hsp90ab1    | 1.7951                |
| Kmt2e       | 1.7773                |
| Smyd3       | 1.7717                |
| Ehmt1       | 1.7687                |
| Kat6a       | 1.7623                |
| Suv420h1    | 1.7483                |
| Setd3       | 1.7422                |
| Setd7       | 1.7264                |
| Ube2a       | 1.7111                |
| Setdb1      | 1.6955                |
| Kdm1a       | 1.6906                |
| Hdac2       | 1.6847                |
| Suv39h1     | 1.6615                |
| Kat7        | 1.6312                |
| Ube2b       | 1.5957                |
| Kmt2c       | 1.5811                |

| Gene Symbol | Fold<br>Down-regulation |
|-------------|-------------------------|
| Kdm5c       | -1.0347                 |
| Kdm4a       | -1.0766                 |
| RTC         | -1.1325                 |
| Hdac10      | -1.1446                 |
| Gapdh       | -1.1529                 |
| Setd5       | -1.1541                 |
| RTC         | -1.1767                 |
| PPC         | -1.2257                 |
| PPC         | -1.2598                 |
| Dnmt3b      | -1.2654                 |
| PPC         | -1.2743                 |
| Dot11       | -1.4744                 |
| Ncoa3       | -2.0448                 |

|         |        |
|---------|--------|
| Gusb    | 1.5716 |
| Whsc1   | 1.5705 |
| Hdac4   | 1.5591 |
| Kat8    | 1.5512 |
| Setd8   | 1.5468 |
| Prmt1   | 1.5446 |
| Hdac6   | 1.5141 |
| Cdyl    | 1.5083 |
| Setd1b  | 1.5081 |
| Setd1a  | 1.4944 |
| Atf2    | 1.4881 |
| Ncoa1   | 1.4651 |
| Kat2a   | 1.4298 |
| Dnmt1   | 1.4218 |
| Hdac5   | 1.4107 |
| Csrp2bp | 1.377  |
| Rps6ka5 | 1.3609 |
| Carm1   | 1.3532 |
| Aurkc   | 1.3389 |
| Prmt8   | 1.3389 |
| MGDC    | 1.3389 |
| Kdm5b   | 1.3212 |
| Ehmt2   | 1.2698 |
| Hdac1   | 1.2321 |
| Hdac3   | 1.2255 |
| Dnmt3a  | 1.21   |
| Usp22   | 1.1765 |
| Kat5    | 1.1718 |
| Actb    | 1.1529 |
| Kdm6b   | 1.0403 |
| Prmt2   | 1.003  |



**Table SII. Patient clinical characteristics. Related to Figure 2A.**

| <b>Patient Characteristic</b> | <b>Non-diabetic</b> | <b>Diabetic</b> |
|-------------------------------|---------------------|-----------------|
| Age                           | 73.3 (10.9)         | 64.3 (3.2)      |
| Male                          | 100%                | 50%             |
| BMI                           | 28.3 (1.6)          | 31.2 (1.8)      |
| Prior Tobacco Use             | 66%                 | 83%             |
| Diabetes                      | N/A                 | 100%            |
| Hgb A1c                       | N/A                 | 8.4 (0.3)       |
| Hypertension                  | 100%                | 83%             |
| Hyperlipidemia                | 66%                 | 83%             |
| Coronary Artery Disease       | 33%                 | 17%             |
| Medications                   |                     |                 |
| Insulin Dependent             | N/A                 | 33%             |
| Oral Hyperglycemic            | N/A                 | 66%             |
| Immunosuppressants            | 0%                  | 0%              |

BMI, body mass index; Hgb A1c, hemoglobin A1C; N/A, non-applicable.  
Continuous variables expressed as mean (SEM) and categorical variables expressed as percentages.

**Table SIII. Cellular metabolites in BMDMs from *Setdb2<sup>ff</sup>Lyz2<sup>Cre-</sup>* and *Setdb2<sup>ff</sup>Lyz2<sup>Cre+</sup>*. Related to Figure 6A.**

| Metabolite                       | <i>Setdb2<sup>ff</sup>Lyz2<sup>Cre-</sup></i><br>(AUC) | <i>Setdb2<sup>ff</sup>Lyz2<sup>Cre+</sup></i><br>(AUC) | P value |
|----------------------------------|--------------------------------------------------------|--------------------------------------------------------|---------|
| 2,3-Phosphoglycerate             | 12264.4 (373.6)                                        | 14937.4 (1452.9)                                       | 0.1     |
| Acetyl-CoA                       | 11666.1 (617.0)                                        | 15198.9 (915.40)                                       | 0.03    |
| Acetylphosphate                  | 9641.5 (2525.8)                                        | 9815.5 (1799.2)                                        | 1.0     |
| Adenine                          | 37385.2 (5072.8)                                       | 48955.0 (7718.8)                                       | 0.3     |
| Adenosine                        | 6930.2 (1263.7)                                        | 6628.8 (395.8)                                         | 0.8     |
| ADP                              | 303792.3 (13618.8)                                     | 336088.1 (31789.1)                                     | 0.4     |
| ADP-D-glucose                    | 17933.5 (555.4)                                        | 19762.8 (1266.3)                                       | 0.3     |
| Alanine                          | 138423.7 (11616.6)                                     | 148568.1 (3770.9)                                      | 0.5     |
| Alpha-Ketoglutarate              | 134557.3 (5441.3)                                      | 161572.4 (5951.2)                                      | 0.03    |
| AMP                              | 36535.3 (889.2)                                        | 37799.0 (1177.3)                                       | 0.44    |
| Arginine                         | 1962154.2 (79268.6)                                    | 1550482.3 (69709.2)                                    | 0.02    |
| Asparagine                       | 1291131.6 (88990.2)                                    | 1155547.2 (44224.8)                                    | 0.24    |
| Aspartate                        | 775433.8 (27872.0)                                     | 713314.7 (21131.2)                                     | 0.15    |
| ATP                              | 3371707.0 (150695.5)                                   | 3857665.6 (165640.2)                                   | 0.10    |
| Citrate/isocitrate               | 4030612.2 (54561.8)                                    | 4242428.5 (127266.7)                                   | 0.20    |
| Citrulline                       | 127288.8 (2851.1)                                      | 104508.8 (6183.3)                                      | 0.03    |
| CMP                              | 11535.7 (248.5)                                        | 10327.6 (1070.2)                                       | 0.33    |
| CoA                              | 12141.9 (620.7)                                        | 14527.3 (875.0)                                        | 0.09    |
| Creatinine                       | 68564.2 (772.3)                                        | 62910.6 (1673.3)                                       | 0.04    |
| CTP                              | 95089.1 (2656.7)                                       | 108691.4 (5446.3)                                      | 0.09    |
| Deoxyuridine                     | 39369.0 (8674.6)                                       | 33519.3 (5361.2)                                       | 0.60    |
| D-Rib(ul)ose-5-phosphate         | 7522.6 (604.7)                                         | 7576.4 (537.5)                                         | 0.95    |
| FAD                              | 12043.9 (645.3)                                        | 15374.6 (1333.9)                                       | 0.09    |
| Fructose 1,6-bisphosphate        | 128922.2 (8380.7)                                      | 156552.7 (9689.5)                                      | 0.10    |
| GDP                              | 34656.6 (3453.0)                                       | 35402.7 (2048.5)                                       | 0.86    |
| Gluconate                        | 256166.9 (10954.8)                                     | 256215.4 (5478.1)                                      | 1.00    |
| Glucosamine-1-P/6-P              | 15747.8 (222.4)                                        | 16206.0 (729.1)                                        | 0.58    |
| Glutamate                        | 4240698.7 (53570.6)                                    | 4677222.9 (177424.6)                                   | 0.08    |
| Glutamine                        | 14796662.8 (256230.0)                                  | 12004518.4 (774345.5)                                  | 0.03    |
| Glycerol-3-phosphate             | 364404.3 (10717.9)                                     | 407383.3 (30220.4)                                     | 0.25    |
| Glycine                          | 52364.1 (860.0)                                        | 37101.8 (2522.8)                                       | 0.00    |
| GMP                              | 4203.6 (360.7)                                         | 4041.1 (360.5)                                         | 0.77    |
| GTP                              | 279905.0 (24681.9)                                     | 311557.7 (14731.7)                                     | 0.33    |
| Hexose                           | 4932348.4 (95617.1)                                    | 3956330.4 (230380.5)                                   | 0.02    |
| Hexose-phosphate                 | 88195.9 (9573.5)                                       | 104568.5 (15411.8)                                     | 0.42    |
| Histidine                        | 1453472.2 (30401.4)                                    | 1286107.9 (81240.7)                                    | 0.13    |
| Hypoxanthine                     | 1074599.2 (18990.5)                                    | 1022677.2 (38369.0)                                    | 0.29    |
| Itaconate                        | 534140.9 (22753.8)                                     | 600555.7 (33011.2)                                     | 0.17    |
| Lactate                          | 257205.6 (38343.6)                                     | 123555.5 (29144.6)                                     | 0.05    |
| Leucine/isoleucine               | 10880011.1 (188041.0)                                  | 8979095.2 (421703.3)                                   | 0.01    |
| Lysine                           | 551509.8 (9237.7)                                      | 438464.4 (27635.8)                                     | 0.02    |
| Malate                           | 1012820.9 (70171.8)                                    | 1076266.6 (55819.8)                                    | 0.52    |
| Methionine                       | 547756.7 (10523.8)                                     | 439877.3 (19703.9)                                     | 0.01    |
| N-Acetyl-glucosamine-1-phosphate | 18992.0 (508.0)                                        | 23580.6 (2095.8)                                       | 0.10    |
| N-acetyl-neuraminic acid         | 205551.9 (15877.4)                                     | 150028.7 (13599.0)                                     | 0.06    |
| NAD <sup>+</sup>                 | 197655.8 (2564.5)                                      | 241769.9 (10478.8)                                     | 0.01    |
| NADH                             | 39244.9 (2200.0)                                       | 44054.1 (3808.3)                                       | 0.34    |
| NADP <sup>+</sup>                | 18549.9 (1889.8)                                       | 19371.8 (2069.1)                                       | 0.78    |
| NADPH                            | 43435.7 (1316.0)                                       | 53003.6 (2679.6)                                       | 0.03    |
| Oleic acid                       | 621839.8 (22149.6)                                     | 557250.6 (23677.0)                                     | 0.12    |
| Ornithine                        | 591587.0 (40059.6)                                     | 446006.8 (17007.9)                                     | 0.03    |
| Oxidized glutathione             | 177773.3 (15066.6)                                     | 175660.0 (6202.3)                                      | 0.90    |
| Palmitic acid                    | 4749700.2 (1176443.6)                                  | 4018057.9 (732496.0)                                   | 0.63    |
| Pantothenate                     | 709092.8 (29945.4)                                     | 629986.6 (27594.2)                                     | 0.12    |

|                            |                       |                        |      |
|----------------------------|-----------------------|------------------------|------|
| Phenylalanine              | 1948009.5 (68490.7)   | 1600994.5 (66214.2)    | 0.02 |
| Phenylpyruvate             | 44227.7 (555.8)       | 37699.9 (2177.1)       | 0.04 |
| Phosphocreatine            | 156159.4 (5043.2)     | 212949.0 (16337.2)     | 0.03 |
| Proline                    | 674565.5 (4571.6)     | 556349.3 (26487.9)     | 0.01 |
| PS 38:4                    | 2208222.2 (619915.9)  | 3106456.6 (228782.7)   | 0.25 |
| PS 40:6                    | 1104232.3 (318782.6)  | 1559271.4 (114488.4)   | 0.25 |
| Quinolate                  | 7404.5 (293.1)        | 6479.8 (396.7)         | 0.13 |
| Reduced glutathione        | 2306735.3 (122951.3)  | 2921844.9 (301680.0)   | 0.13 |
| Stearic acid               | 7754375.2 (2233283.2) | 6633317.3 (1488361.1)  | 0.70 |
| Succinate                  | 150243.8 (6546.4)     | 131966.7 (9631.4)      | 0.19 |
| Taurine                    | 28775312.7 (720358.6) | 32438746.8 (1340214.1) | 0.07 |
| Threonine                  | 362845.8 (6225.7)     | 281224.2 (14847.8)     | 0.01 |
| Tryptophan                 | 728682.9 (29371.8)    | 597773.0 (22852.8)     | 0.02 |
| Tyrosine                   | 1801880.9 (42356.4)   | 1517693.2 (90224.4)    | 0.05 |
| UDP-D-glucose              | 398227.9 (9344.3)     | 472761.4 (24687.8)     | 0.05 |
| UDP-D-glucuronate          | 60377.7 (295.4)       | 73787.1 (5219.2)       | 0.06 |
| UDP-N-acetyl-D-glucosamine | 317893.3 (6863.9)     | 357699.3 (20176.2)     | 0.14 |
| Uracil                     | 4623.7 (2002.9)       | 1727.2 (610.3)         | 0.24 |
| UTP                        | 403819.4 (14138.7)    | 465197.8 (27293.9)     | 0.12 |
| Valine                     | 1080686.3 (13200.5)   | 892409.0 (38404.5)     | 0.01 |
| Xanthine                   | 327270.2 (5203.9)     | 240360.0 (17886.1)     | 0.01 |

AUC, area under the curve. Values expressed as mean (SEM) representing the mean of 3 independent samples.
